# Supplementary material for: Molecular insights into receptor binding of recent emerging SARS-CoV-2 variants
Source: PubMed Central journal article supplement (PMC8528823; doi:10.1038/s41467-021-26401-w), 2021-10-20
Supplement: 41467_2021_26401_MOESM1_ESM.pdf [file 41467_2021_26401_MOESM1_ESM.pdf]

1 **Supplementary Information**

2

3 **Molecular insights into receptor binding of recent emerging**

4 **SARS-CoV-2 variants**

5 Pengcheng Han<sup>1,2,3,†</sup>, Chao Su<sup>1,4,†</sup>, Yanfang Zhang<sup>1,5,†</sup>, Chongzhi Bai<sup>6,7,†</sup>, Anqi Zheng<sup>1,8</sup>,  
6 Chengpeng Qiao<sup>1</sup>, Qing Wang<sup>9</sup>, Sheng Niu<sup>1,10</sup>, Qian Chen<sup>1,11</sup>, Yuqin Zhang<sup>1,8</sup>, Weiwei  
7 Li<sup>1,8</sup>, Hanyi Liao<sup>1,8</sup>, Jing Li<sup>1</sup>, Zengyuan Zhang<sup>1,8</sup>, Heecheol Cho<sup>2</sup>, Mengsu Yang<sup>4</sup>,  
8 Xiaoyu Rong<sup>1,12</sup>, Yu Hu<sup>1,13</sup>, Niu Huang<sup>9,14</sup>, Jinghua Yan<sup>15</sup>, Qihui Wang<sup>1</sup>, Xin Zhao<sup>1,16,\*</sup>,  
9 George Fu Gao<sup>1,4,8,\*</sup>, Jianxun Qi<sup>1,8,\*</sup>

10 \*These authors contributed equally

11 †Corresponding author. Email: [jxqi@im.ac.cn](mailto:jxqi@im.ac.cn) (J.X.); [gaof@im.ac.cn](mailto:gaof@im.ac.cn) (G.F.G);  
12 [zhaoxin@im.ac.cn](mailto:zhaoxin@im.ac.cn) (X.Z.)

**Supplementary Table 1. Data collection and refinement statistics**

|                                       | Alpha<br>RBD-<br>hACE2                 | Beta RBD-<br>hACE2                         | Gamma<br>RBD-<br>hACE2                     | Mink-<br>Y453F<br>RBD-<br>hACE2                | Mink-<br>F486L<br>RBD-<br>hACE2                |
|---------------------------------------|----------------------------------------|--------------------------------------------|--------------------------------------------|------------------------------------------------|------------------------------------------------|
| <b>Data collection</b>                |                                        |                                            |                                            |                                                |                                                |
| Space group                           | <i>P41212</i>                          | <i>P41212</i>                              | <i>P41212</i>                              | <i>P41212</i>                                  | <i>P41212</i>                                  |
| Cell dimensions                       |                                        |                                            |                                            |                                                |                                                |
| <i>a</i> , <i>b</i> , <i>c</i> (Å)    | 104.53,<br>104.53,<br>230.47           | 105.15,<br>105.15,<br>230.94               | 103.354,<br>103.354,<br>229.784            | 103.354,<br>103.354,<br>229.784                | 104.316,<br>104.316,<br>228.37                 |
| $\alpha$ , $\beta$ , $\gamma$ (°)     | 90, 90, 90                             | 90, 90, 90                                 | 90, 90, 90                                 | 90, 90,<br>90                                  | 90, 90,<br>90                                  |
| Resolution (Å)                        | 28.12-2.85<br>(2.92-2.85) <sup>a</sup> | 27.01-2.63<br>(2.70-<br>2.63) <sup>a</sup> | 50.00-2.80<br>(2.90-<br>2.80) <sup>a</sup> | 50.00-<br>2.40<br>(2.49-<br>2.40) <sup>a</sup> | 50.00-<br>2.70<br>(2.80-<br>2.70) <sup>a</sup> |
| Unique reflections                    | 30710                                  | 39380                                      | 31516                                      | 49236                                          | 35606                                          |
| $R_{\text{merge}}^b$                  | 0.187<br>(2.105) <sup>a</sup>          | 0.125<br>(2.236) <sup>a</sup>              | 0.141<br>(1.381) <sup>a</sup>              | 0.177<br>(1.916) <sup>a</sup>                  | 0.178<br>(1.514) <sup>a</sup>                  |
| $R_{\text{pim}}^c$                    | 0.041<br>(0.444) <sup>a</sup>          | 0.027<br>(0.476) <sup>a</sup>              | 0.043<br>(0.421) <sup>a</sup>              | 0.041<br>(0.508) <sup>a</sup>                  | 0.042<br>(0.351) <sup>a</sup>                  |
| $I/\sigma I$                          | 16.5 (2.1) <sup>a</sup>                | 21.9 (2.0) <sup>a</sup>                    | 17.884<br>(1.726) <sup>a</sup>             | 19.826<br>(1.661) <sup>a</sup>                 | 20.354<br>(2.388) <sup>a</sup>                 |
| $CC_{1/2}$                            | 0.999<br>(0.684) <sup>a</sup>          | 1.000<br>(0.744) <sup>a</sup>              | 0.997<br>(0.717) <sup>a</sup>              | 0.998<br>(0.565) <sup>a</sup>                  | 0.996<br>(0.771) <sup>a</sup>                  |
| Completeness (%)                      | 99.9 (100) <sup>a</sup>                | 99.0 (100) <sup>a</sup>                    | 99.9 (100) <sup>a</sup>                    | 99.8<br>(98.5) <sup>a</sup>                    | 100<br>(100) <sup>a</sup>                      |
| Redundancy                            | 21.7 (22.8) <sup>a</sup>               | 21.8<br>(22.6) <sup>a</sup>                | 11.3(11.6) <sup>a</sup>                    | 18.7<br>(14.6) <sup>a</sup>                    | 19.0<br>(18.2) <sup>a</sup>                    |
| <b>Refinement</b>                     |                                        |                                            |                                            |                                                |                                                |
| Resolution (Å)                        | 27.86-2.85                             | 26.91-2.63                                 | 19.92-2.80                                 | 20.39-<br>2.40                                 | 20.50-<br>2.70                                 |
| No. reflections                       | 30617                                  | 39271                                      | 29219                                      | 46716                                          | 34993                                          |
| $R_{\text{work}} / R_{\text{free}}^c$ | 0.2081/0.22<br>38                      | 0.2138/0.2<br>484                          | 0.2141/0.2<br>252                          | 0.2098/0.<br>2280                              | 0.2119/<br>0.2407                              |
| No. atoms                             |                                        |                                            |                                            |                                                |                                                |
| Protein                               | 6436                                   | 6414                                       | 6420                                       | 6410                                           | 6408                                           |
| Ligand/ion                            | 85                                     | 99                                         | 99                                         | 57                                             | 57                                             |
| Water                                 | 0                                      | 21                                         | 50                                         | 250                                            | 0                                              |
| <i>B</i> -factors                     |                                        |                                            |                                            |                                                |                                                |
| Protein                               | 72.44                                  | 72.49                                      | 52.98                                      | 45.51                                          | 45.31                                          |
| Ligand/ion                            | 116.23                                 | 119.70                                     | 104.26                                     | 85.01                                          | 90.45                                          |

|                   |       |       |       |       |       |
|-------------------|-------|-------|-------|-------|-------|
| Water             |       | 59.42 | 38.55 | 40.79 |       |
| R.m.s. deviations |       |       |       |       |       |
| Bond lengths      | 0.005 | 0.004 | 0.002 | 0.005 | 0.005 |
| (Å)               |       |       |       |       |       |
| Bond angles       | 0.695 | 0.621 | 0.477 | 0.742 | 0.691 |
| (°)               |       |       |       |       |       |
| Ramachandran plot |       |       |       |       |       |
| Favored (%)       | 98.22 | 97.97 | 98.48 | 97.59 | 97.59 |
| Allowed (%)       | 1.78  | 2.03  | 1.52  | 2.41  | 2.41  |
| Outliers (%)      | 0.00  | 0.00  | 0.00  | 0.00  | 0.00  |

---

14 <sup>a</sup> Values in parentheses are for highest-resolution shell.

15

16 **Supplementary Table 2. MM/PBSA calculation results of WT RBD-hACE2 and**  
 17 **Mink-Y453F RBD-hACE2 systems**

|                     | $\Delta E_{MM}$ (kcal·mol <sup>-1</sup> ) | $\Delta E_{Solvation}$ (kcal·mol <sup>-1</sup> ) | $\Delta E_{Binding}$ (kcal·mol <sup>-1</sup> ) |
|---------------------|-------------------------------------------|--------------------------------------------------|------------------------------------------------|
| Y453F               | -396.36 ± 21.94                           | 150.04 ± 37.50                                   | -246.33 ± 36.30                                |
| RBD                 | -387.28 ± 21.69                           | 148.85 ± 36.40                                   | -238.43 ± 36.06                                |
| $\Delta$ (Y453F-WT) | -9.08                                     | 1.19                                             | -7.90                                          |

18 MM/PBSA: molecular mechanics/Poisson-Boltzmann surface area; Y453F: Mink-  
 19 Y453F RBD-hACE2; WT: WT RBD-hACE2

20 **Supplementary Table 3. Energy decomposition of the single residues in the RBD-**

21 **ACE2 binding interface**

| Residue   | $\Delta\Delta E_{MM}$ (kcal·mol <sup>-1</sup> ) | $\Delta\Delta E_{Solvation}$ (kcal·mol <sup>-1</sup> ) | $\Delta\Delta E_{Binding}$ (kcal·mol <sup>-1</sup> ) |
|-----------|-------------------------------------------------|--------------------------------------------------------|------------------------------------------------------|
| hACE2 D30 | 2.96                                            | -3.99                                                  | -1.03                                                |
| RBD R403  | -1.08                                           | -0.23                                                  | -1.31                                                |
| RBD       |                                                 |                                                        |                                                      |
| Y453F     | 0.48                                            | -1.51                                                  | -1.03                                                |
| RBD K417  | -0.12                                           | -0.37                                                  | -0.50                                                |

22 The binding energies are analyzed at a cutoff of -0.5 kcal·mol<sup>-1</sup> ( $\Delta\Delta E = \Delta E_{Y453F} - \Delta E_{WT}$ ).

23 Y453F: Mink-Y453F RBD-hACE2; WT: WT RBD-hACE2.

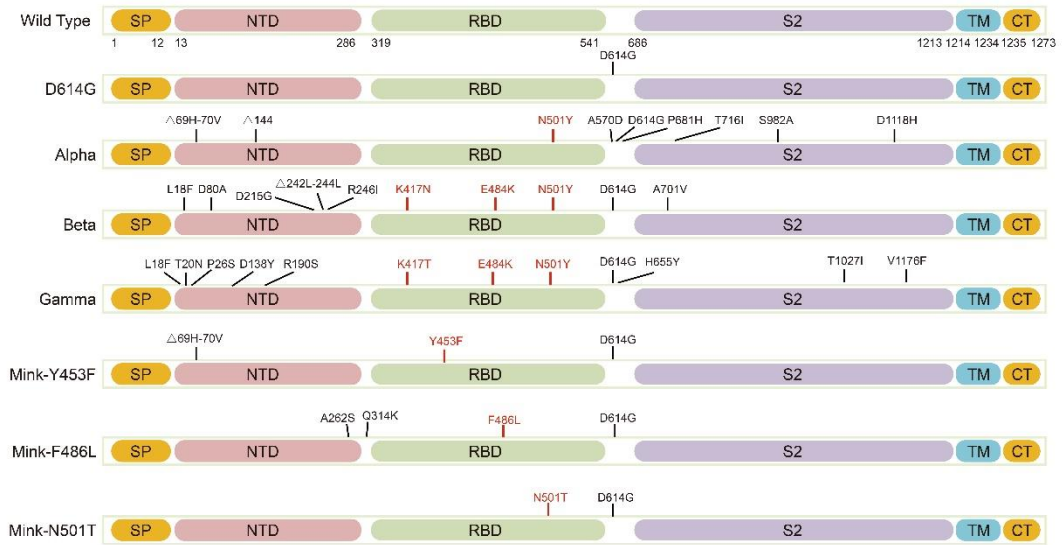

24

25 **Supplementary Figure 1. Schematic representation of SARS-CoV-2 wild type (WT)**

26 **and variant S proteins.** The mutations of amino acids and positions are as indicated.

27 SP: signal peptide, NTD: N-terminal domain, RBD: receptor-binding domain, TM:

28 transmembrane, CT: C-terminal cytoplasmic tail domain.

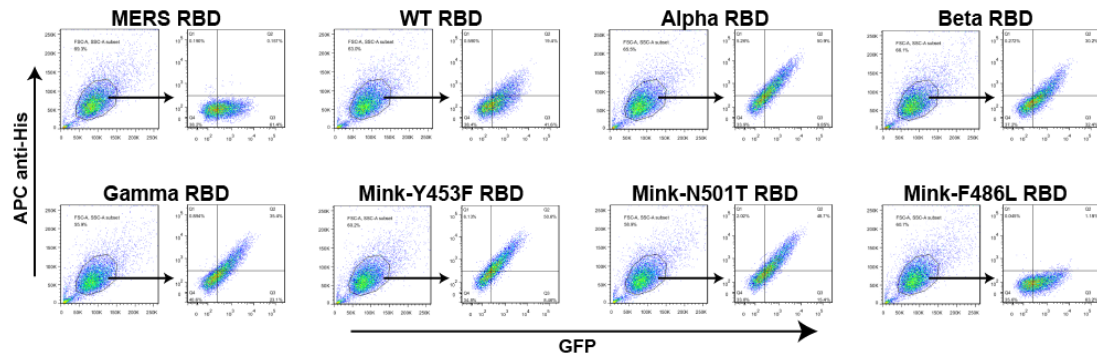

29

30 **Supplementary Figure 2. The gating strategy for flow cytometry analysis of**

31 **SARSCoV-2 variants RBDs binding to BHK21 cells expressing hACE2.** The cells

32 expressing hACE2-GFP were incubated with His-tagged MERS-CoV RBD, SARS-

33 CoV-2 WT RBD, Alpha RBD, Beta RBD, Gamma RBD, Mink-Y453F RBD, Mink-

34 N501T RBD, and Mink-F486L RBD, respectively, and then were the strained with the

35 anti-His/APC antibody. The cells populated based on the forward scatter (FSC) and the

36 side scatter (SSC) signals were first gated with the GFP fluorescent densities. The GFP<sup>+</sup>

37 cell population were further divided into the APC<sup>+</sup> population (cells binding to RBD)

38 and APC<sup>-</sup> population (cells not binding to RBD).

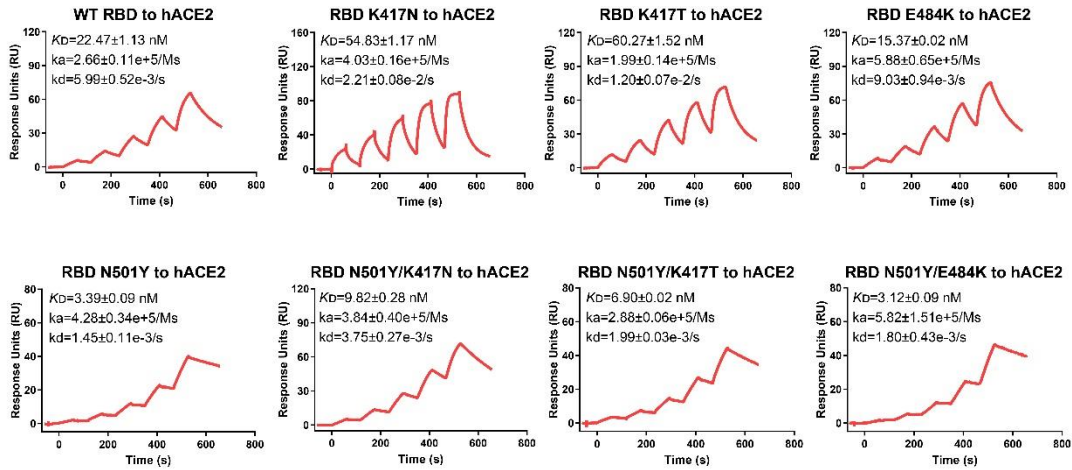

39

40 **Supplementary Figure. 3 Binding affinity of SARS-CoV-2 RBD mutations to**

41 **ACE2, characterized by SPR.** Mouse Fc (mFc)-fused hACE2 in the supernatant was

42 captured in the CM5 chip *via* its interaction with the pre-immobilized anti-mFc

43 antibody. Various concentrations of SARS-CoV-2 WT RBD, RBD K417N, RBD

44 K417T, RBD E484K, RBD N501Y, RBD N501Y/K417N, RBD N501Y/K417T, and

45 RBD N501Y/E484K protein were used to evaluate their binding affinity for hACE2.

46  $K_D$ ,  $k_a$ , and  $k_d$  values are all recorded and the representative results from three

47 experiments are shown. The data are presented as the mean  $\pm$  SEM of three independent

48 replicates (n=3).

49



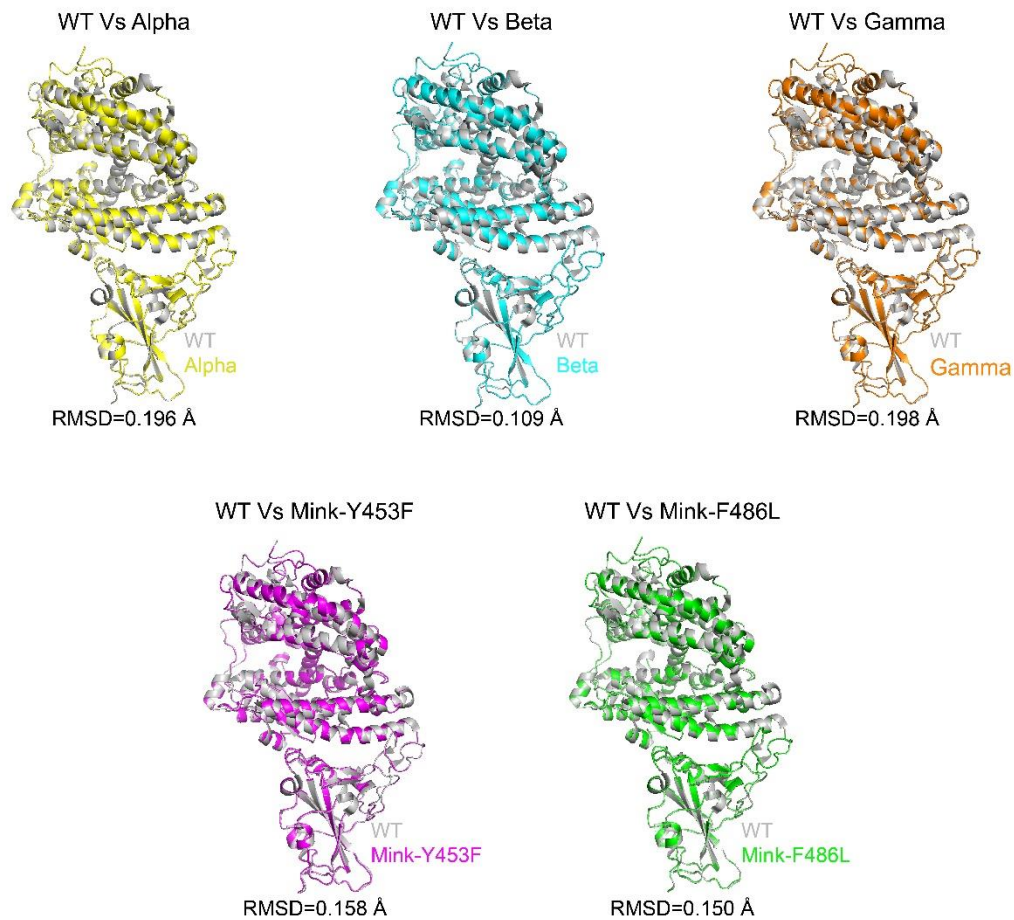

50

51 **Supplementary Figure 4. Overall structural comparison of each variant RBD-**

52 **hACE2 with the WT RBD-hACE2.** The structures of Alpha RBD-hACE2, Beta RBD-

53 hACE2, Gamma RBD-hACE2, Mink-Y453F RBD-hACE2, and Mink-F486L RBD-

54 hACE2 were all aligned with WT RBD-hACE2 (PDB: 6LZG) and are highlighted in

55 yellow, cyan, orange, magenta, and green, respectively. WT RBD-hACE2 is in gray.

56 Root-mean-square deviation (RMSD) is shown.

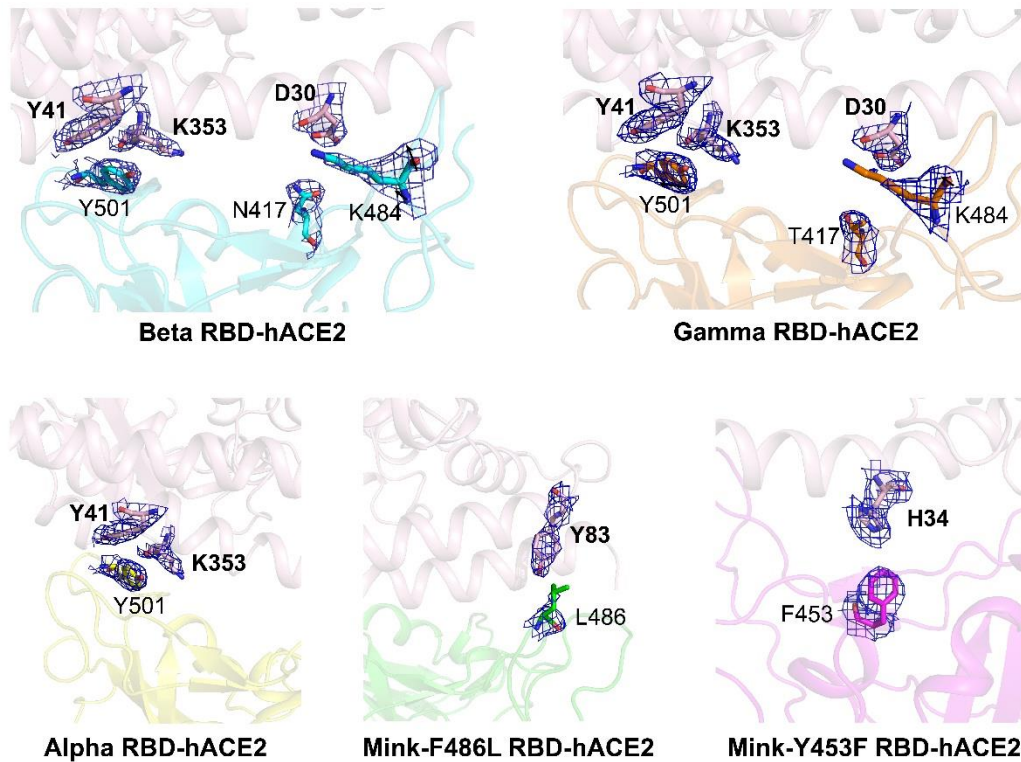

57

58 **Supplementary Figure 5. Representative electron density maps for each of the five**

59 **complex structures evaluated in this study.** The final 2Fo-Fc density maps of the

60 complex structures for hACE2 bound to Beta RBD, Gamma RBD, Alpha RBD, Mink-

61 F486L RBD, and Mink-Y453F RBD are drawn in blue mesh contoured at 1 sigma,

62 respectively.

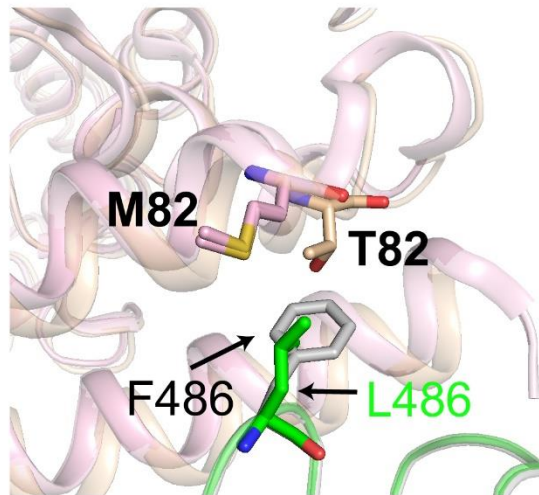

63

64 **Supplementary Figure 6. Structural comparison of miACE2 with both Mink-**

65 **F486L RBD-hACE2 and WT RBD-hACE2 (PDB: 6LZG).** The structure of miACE2

66 was predicted using SWISS-MODE ([swissmodel.expasy.org](http://swissmodel.expasy.org)) with the previously

67 reported structures of ACE2-B0AT1 complex (PDB: 6M18) as a template. miACE2,

68 hACE2, SARS-CoV-2 WT RBD, and Mink-F486L RBD are colored in wheat, light

69 pink, gray and green, respectively. hACE2 M82, miACE2 T82, WT RBD F486, and

70 Mink-F486L RBD L486 are as indicated.

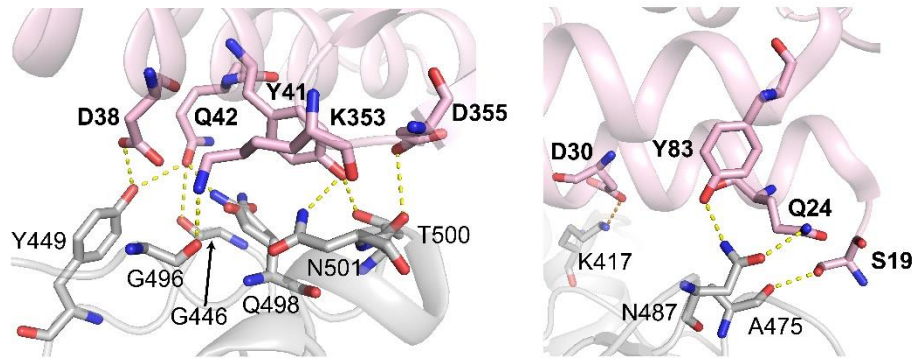

71

72 **Supplementary Figure 7. Detailed hydrogen bond interaction between SARS-**  
 73 **CoV-2 WT RBD and hACE2.** Hydrogen bond interactions in the structure of SARS-  
 74 CoV-2 WT RBD-hACE2 (PDB: 6LZG) were analyzed at a cutoff of 3.5 Å. hACE2 and  
 75 SARS-CoV-2 WT RBD are in light pink and gray, respectively. The key residues are  
 76 shown with stick and are labeled.

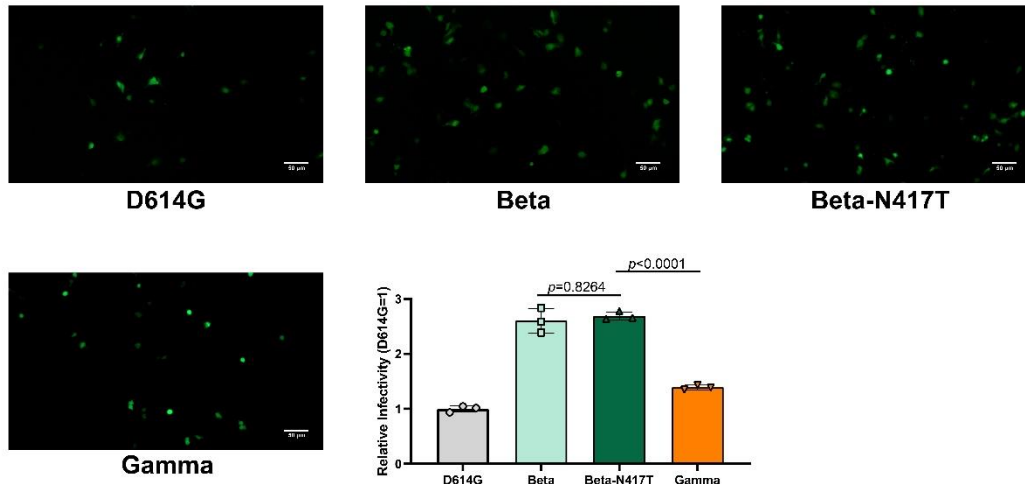

77

78 **Supplementary Figure 8. Entry of SARS-CoV-2 variant pseudoviruses into Huh7**

79 **cells.** The SARS-CoV-2 D614G, Beta, Beta-N417T, and Gamma pseudoviruses' entry

80 into Huh7 cells as evidenced by GFP expression in transduced cells. The GFP-positive

81 cells were quantified using FACS and representative results from three experiments are

82 shown. The values indicate the mean of the three experiments and the bar suggest the

83 SD. Relative infectivity was normalized against that of the D614G pseudovirus.

84 Statistical significance was analyzed using a one-way ANOVA with Tukey's multiple

85 comparison test for multiple groups.

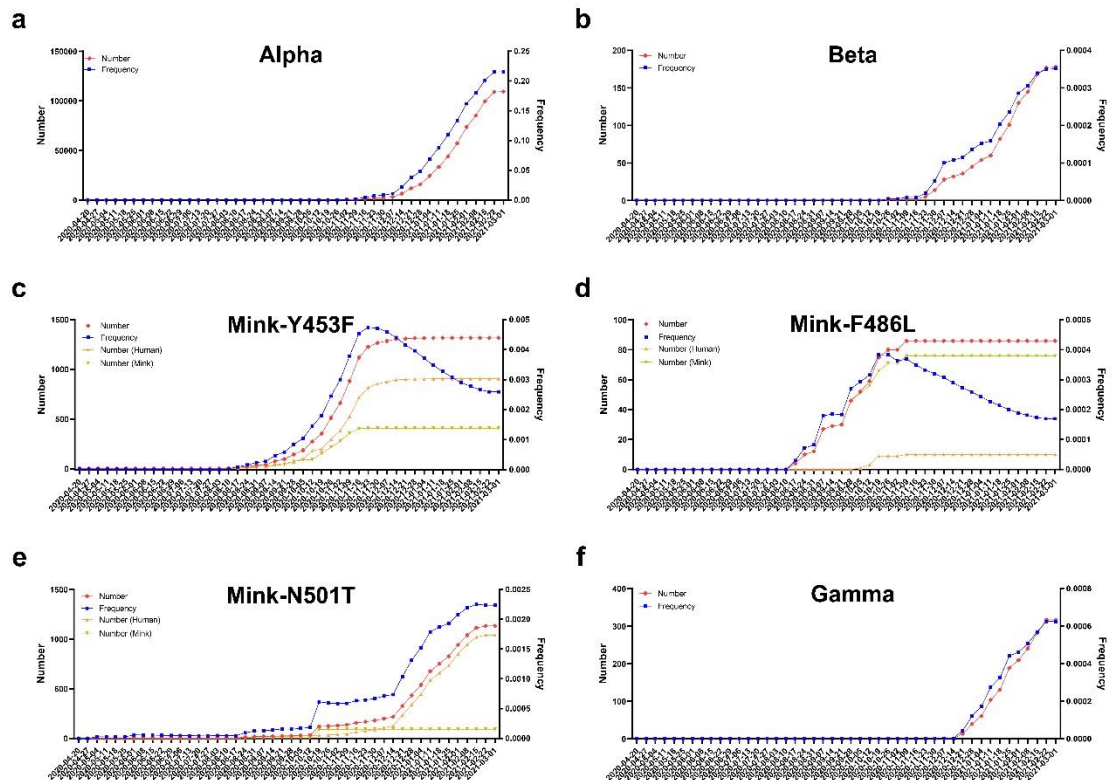

86

87 **Supplementary Figure 9. Number and frequency of SARS-CoV-2 variant S**  
 88 **sequences in the GISAID Initiative database. a-f** The cumulative weekly number and  
 89 frequency of S sequence variations for Alpha (a), Beta (b), Mink-Y453F (c), Mink-  
 90 F486L (d), Mink-N501T (e), and Gamma (f) were calculated between April 20, 2020  
 91 and March 1, 2021. For Mink-N501T, Mink-F486L, and Mink-Y453F, the number of  
 92 new sequences isolated in humans or minks were also calculated.

93
